# Supplementary material
Source: Springer Nature journal article supplement (https://www.springermedizin.de/resource/supplementary/12913_2013_3734_MOESM6_ESM.pdf/9532730)
Supplement: MOESM6 [file 9532730]

Analysis of the first recorded symptoms in 74 consultations from 51 patients

37 consultations where an exact date of GP consultation was provided by the participant

15 where there was evidence in the GP records of a consultation on this date

17 where there was evidence in the GP records of a consultation within the proscribed time window

5 where there was no evidence in the records of a consultation

37 consultations where an estimated date of GP consultation was provided by the participant

23 where there was evidence in the GP records of a consultation within the proscribed time window

14 where there was no evidence in the GP records of a consultation within the proscribed time window
